# Supplementary material
Source: PubMed Central journal article supplement (PMC4937196)

Figure S1

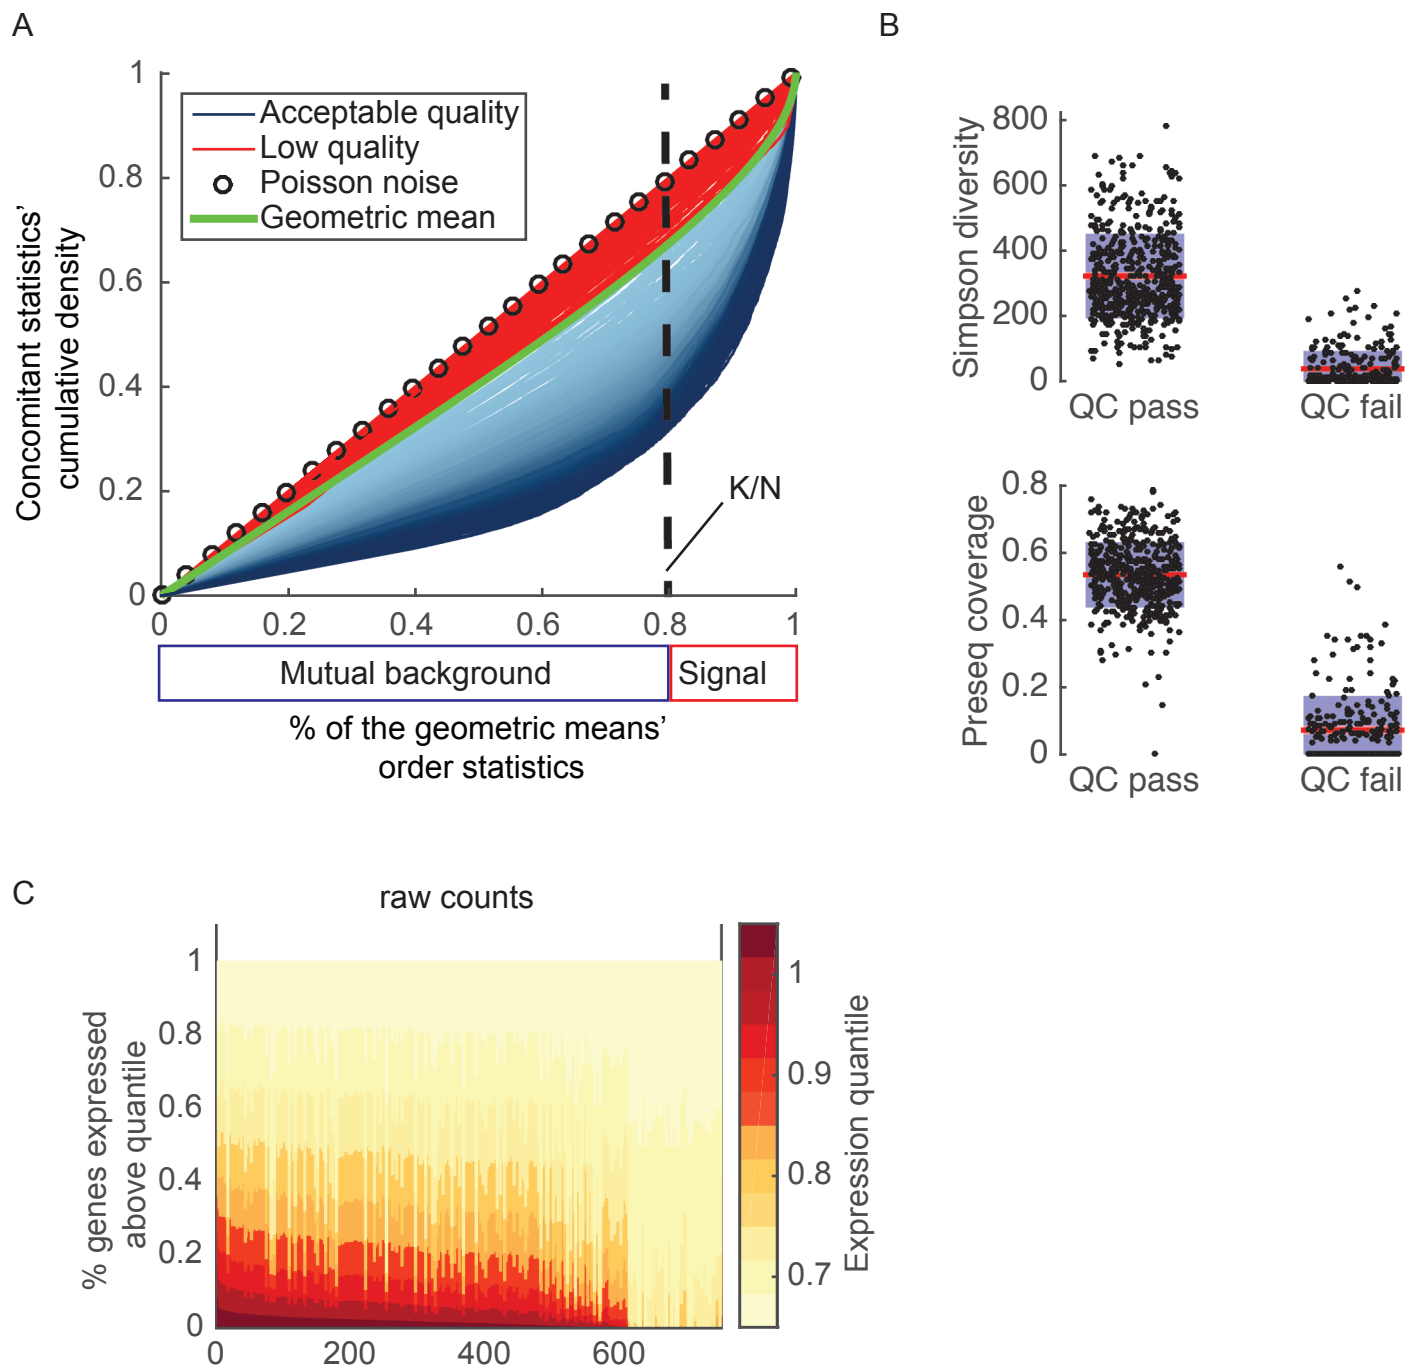

Figure S2

A

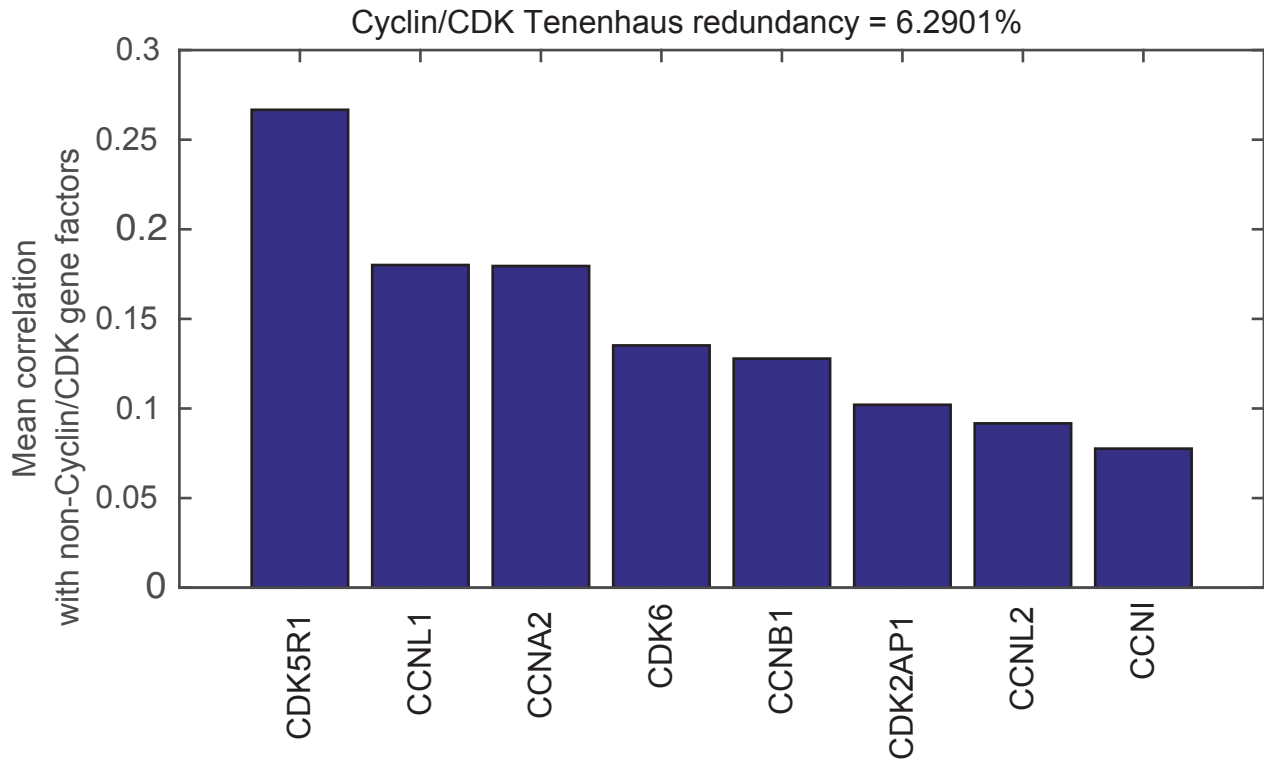

B

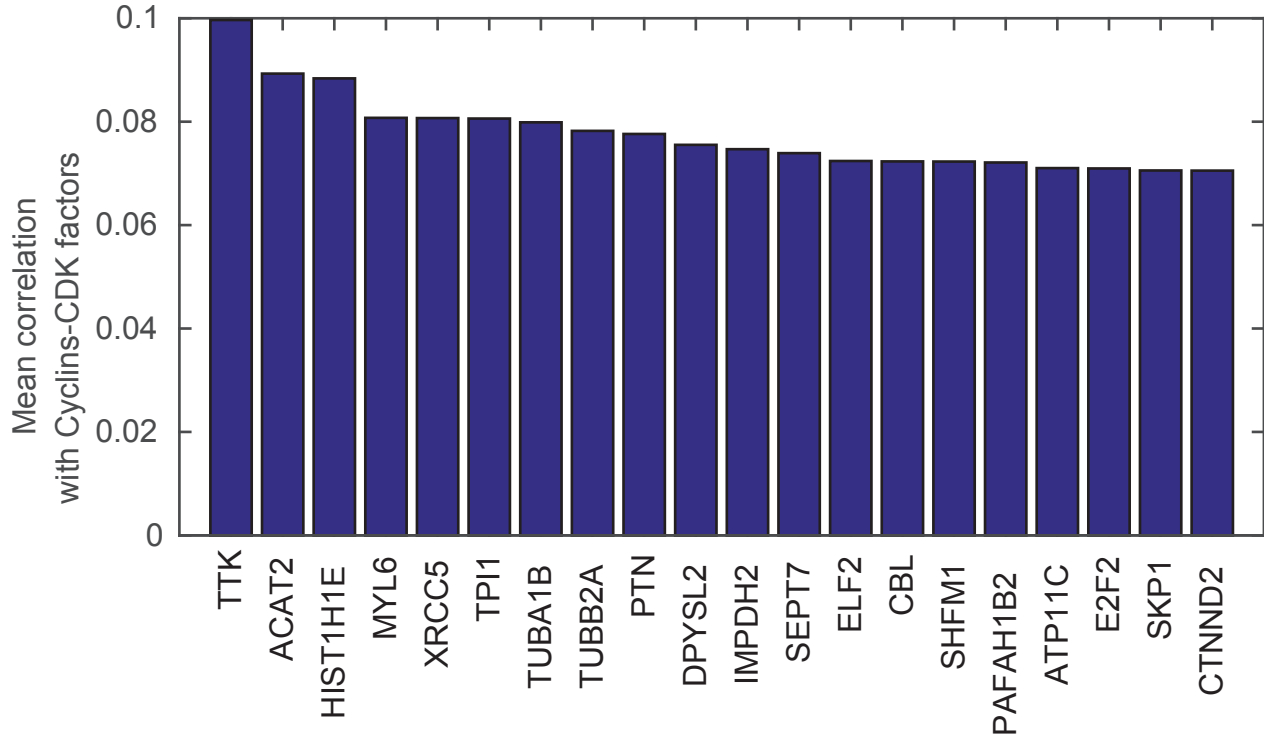

Figure S3

A

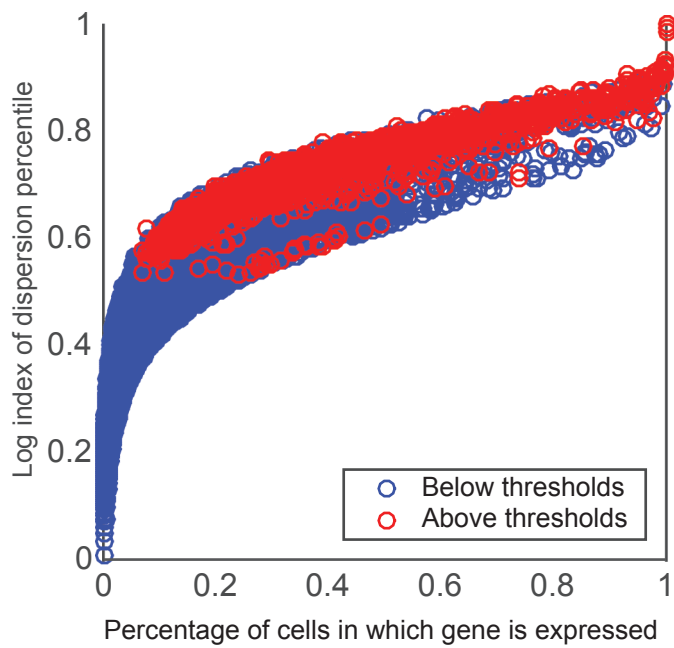

B

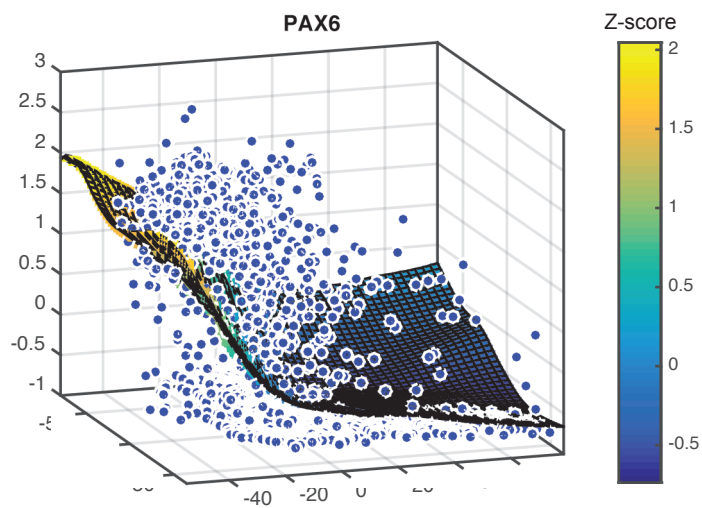

Figure S4

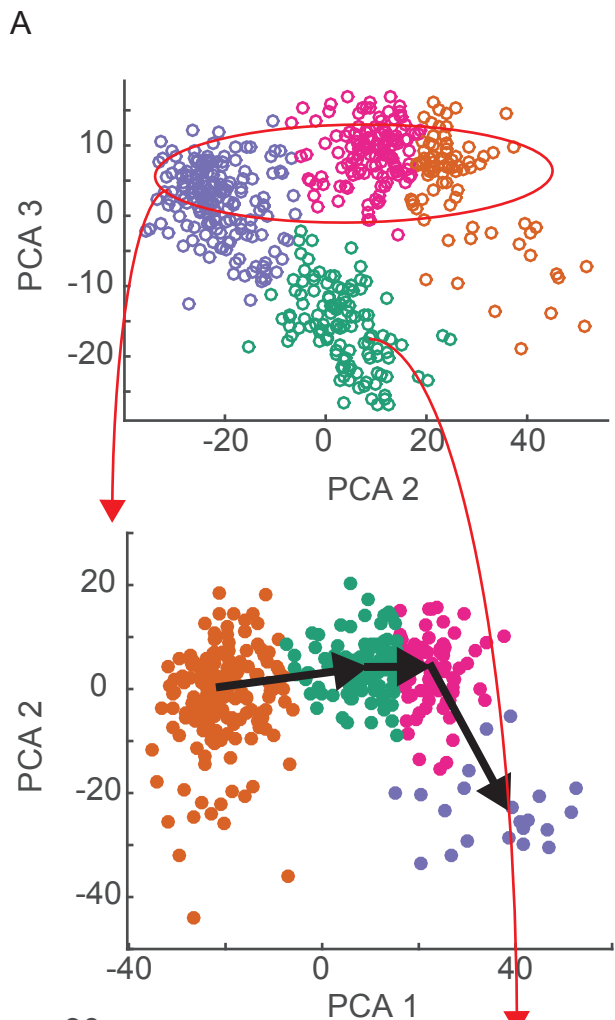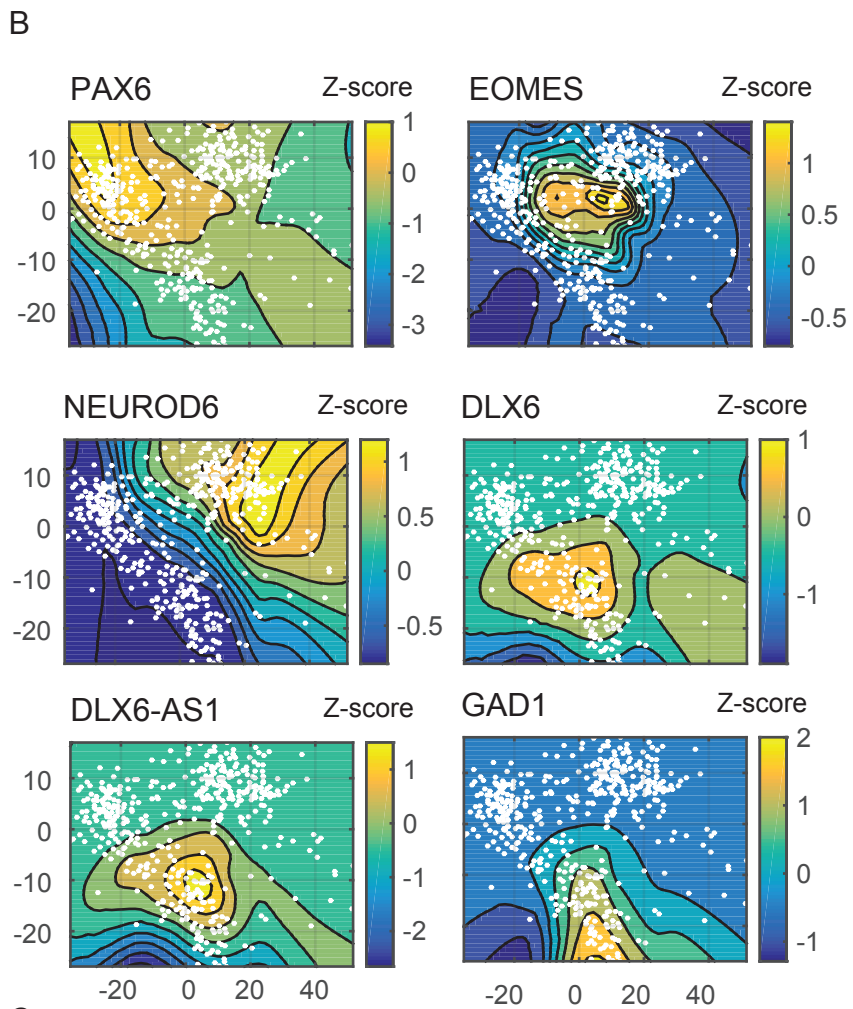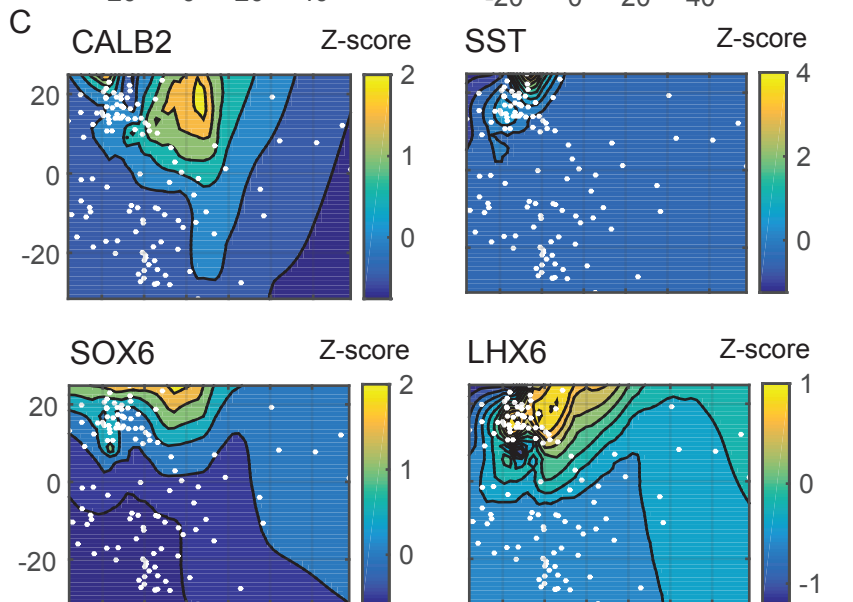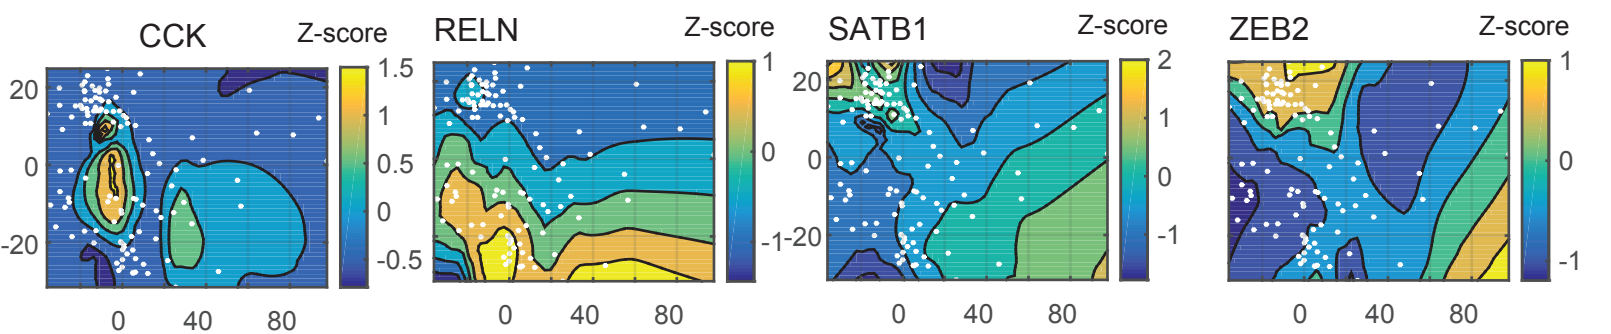

Supplement: supp_btw201_Supplementary_figures.pdf [file supp_btw201_Supplementary_figures.pdf]
